# Supplementary material for: Amino acid and viral binding by the high-affinity Cationic Amino acidTransporter 1 (CAT1) from Mus musculus
Source: Research Square preprint supplement (doi:10.21203/rs.3.rs-4673967/v1), 2024-08-02
Supplement: Supplementary file 2 [file 5f594c48dfd44ef159fbf108.pdf]

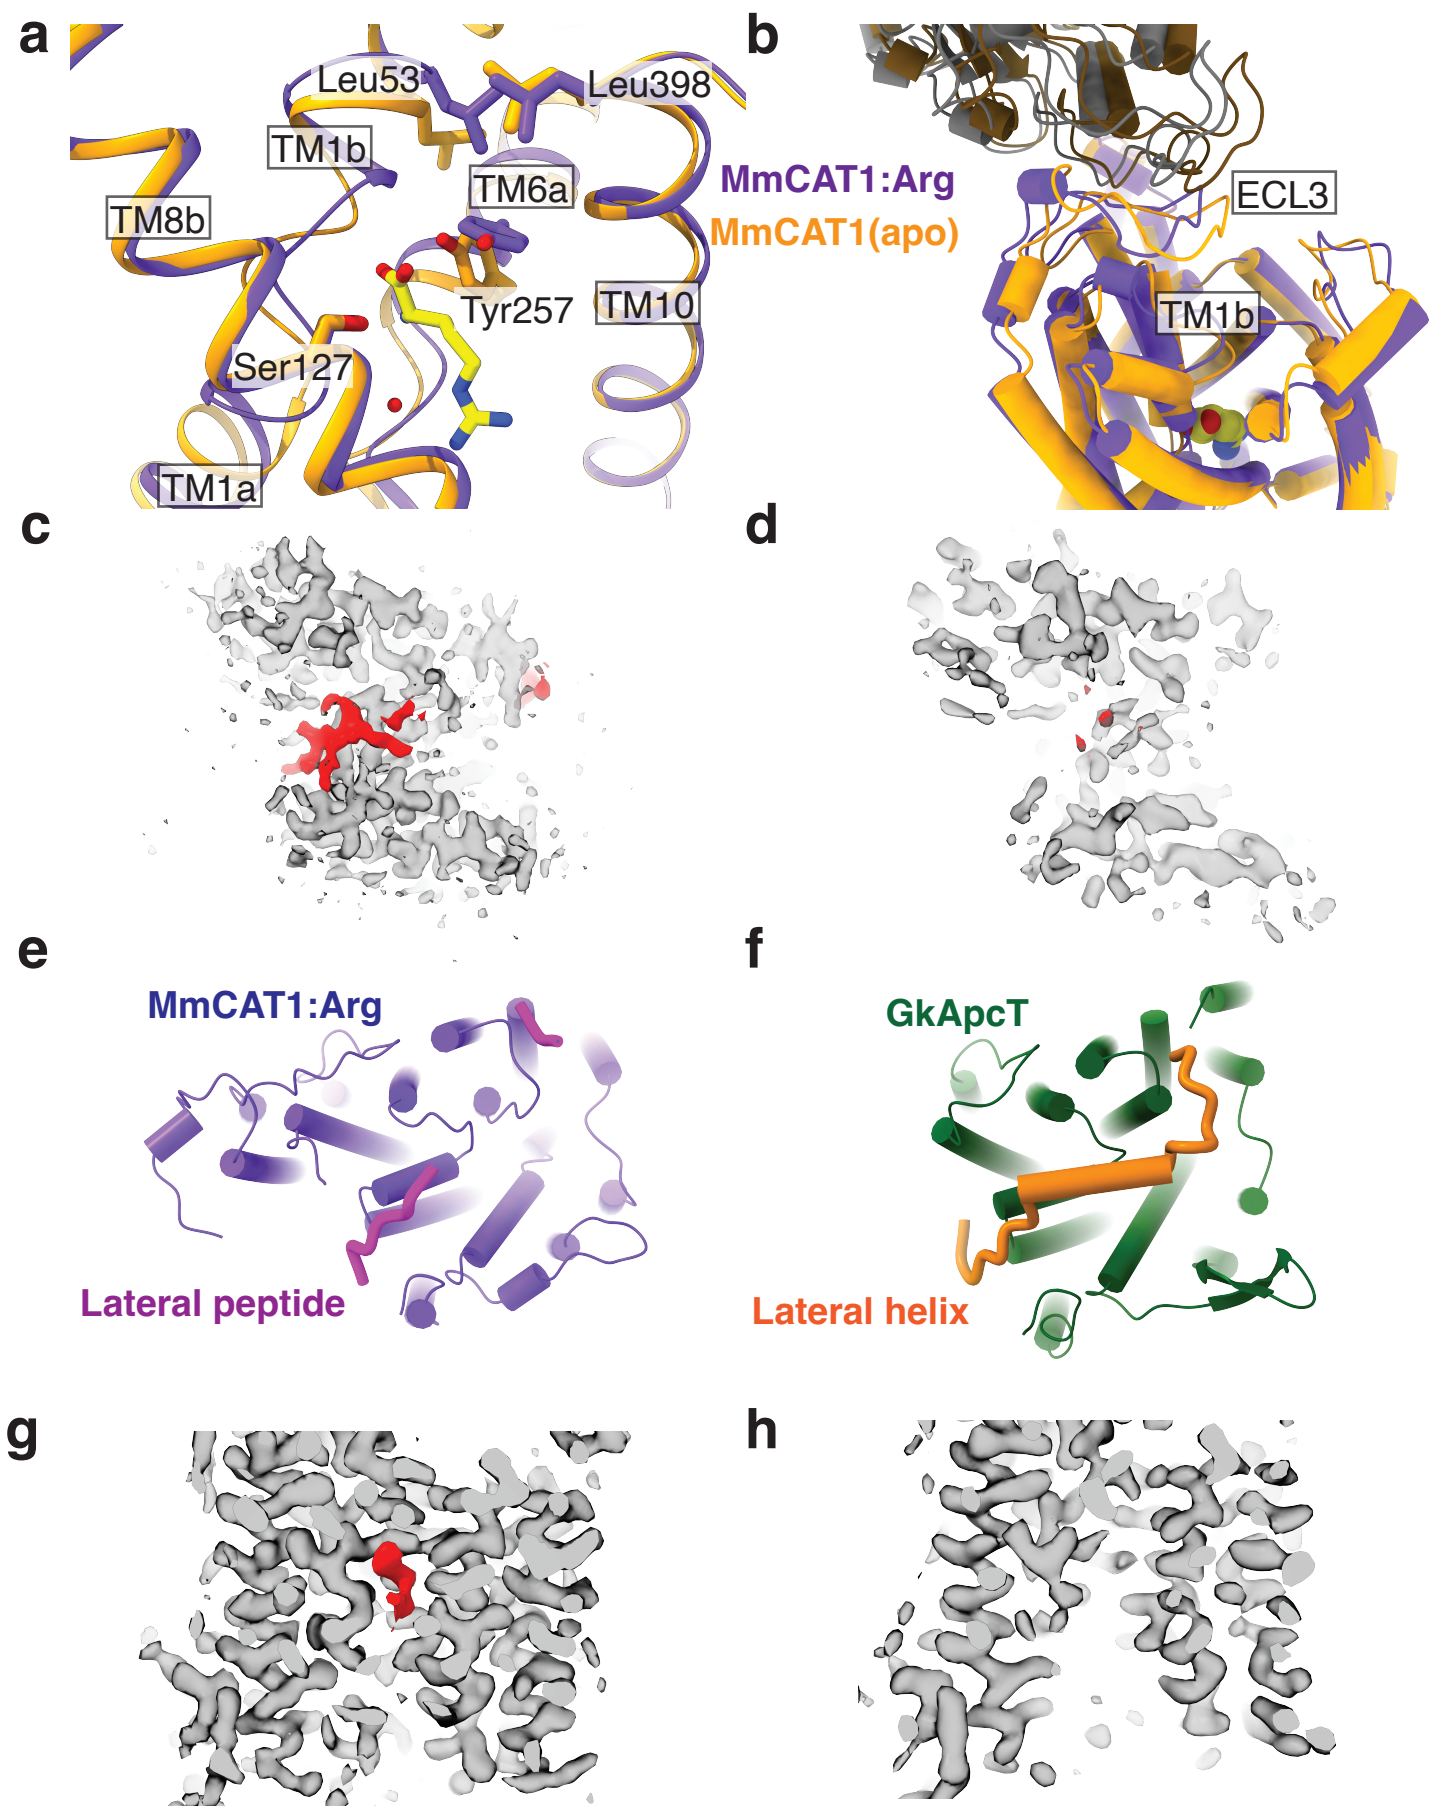

**Extended Data Figure 8. Structure comparison of substrate-bound and apo MmCAT1.** (a) Extracellular gate and (b) extracellular face of arginine-bound and apo MmCAT1, colored in purple and orange, respectively. Cryo-EM map of MmCAT1, with lateral peptide colored in red, for (c) arginine-bound and (d) apo state structures. Location of the lateral peptide (e) in MmCAT1 and (f) the equivalent position in GkApcT. Cryo-EM map of MmCAT1 with for (g) arginine-bound and (h) apo state structures, with arginine colored in red.
